# Supplementary material
Source: publisher figshare collection journal article supplement (https://gsapubs.figshare.com/articles/dataset/_/13724200)
Supplement: Supplementary file 1 [file 1]

## Sheet: Sheet1
SBU Sequence #	Analysis Date	Type	Sample ID	Measured d13C	Corrected d13C	Measured d18O	Corrected d18O	d47	D47	d48	D48	Heated Gas	Equil. Gas	Heated Gas	Equil. Gas	D47	D47 new, acid	D47 new, acid	D48
				(‰, VPDB)	(‰, VPDB)	(‰, VPDB)	(‰, VPDB)	(‰, ref gas)*	(‰, ref gas)*	(‰, ref gas)*	(‰, ref gas)*	Slope#	Slope¥	Intercept#	Intercept¥	(‰, CDES)&	(CDES, +0.081)	(CDES, +0.092)	(‰, HG)@
September 2018 analytical session
258	20_Sept_18	Equil Gas	SBU-EDG-24	-2.91186		-10.4231		4.38944	0.0348424	7.79096	0.48636	0.011078	0.01069	-0.83758	-0.0086189	0.89374	0.97474	0.98574	-0.62921
259	20_Sept_18	Heated Gas	SBU-HEG-29	-2.93971		3.66823		17.3805	-0.631354	37.5036	3.6384	0.011105	0.010713	-0.83794	-0.0086174	0.041636	0.12264	0.133636	0.20432
260	21_Sept_18	Sample	3545 102533A(IV-S)	-2.33643	-2.34521	-1.79582	-1.8721	13.1816	-0.120891	26.34	2.5671	0.011132	0.010736	-0.8383	-0.0086159	0.62665	0.70765	0.71865	-0.010475
261	21_Sept_18	Standard	IAEA-603	2.54714	2.53836	-2.29961	-2.37588	17.2008	-0.387481	25.2313	2.69008	0.01116	0.010759	-0.83865	-0.0086144	0.29982	0.38082	0.39182	0.18662
262	21_Sept_18	Heated Gas	SBU-HDG-60	-3.049		-14.9888		-1.07696	-0.858698	-1.78924	0.522698	0.011187	0.010782	-0.83901	-0.0086129	0.018664	0.099664	0.110664	0.15292
265	24_Sept_18	Heated Gas	SBU-HEG-31	-2.91329		1.83422		15.6276	-0.628825	34.0513	3.7416	0.01127	0.010851	-0.84009	-0.0086084	0.06367	0.14467	0.15567	0.47311
266	24_Sept_18	Standard	IAEA-603	2.55043	2.54164	-2.35146	-2.42773	17.2035	-0.337157	24.9899	2.50383	0.011297	0.010874	-0.84045	-0.0086068	0.35102	0.43202	0.44302	-0.044037
268	25_Sept_18	Sample	3545 102524 #1	-38.6367	-38.6455	-0.951268	-1.02754	-21.9859	-0.533883	28.2019	3.29809	0.011352	0.010919	-0.84117	-0.0086038	0.61013	0.69113	0.70213	0.45952
269	25_Sept_18	Equil Gas	SBU-EDG-25	-2.97943		-10.4538		4.28969	0.0334624	7.94352	0.70343	0.01138	0.010942	-0.84153	-0.0086023	0.89145	0.97245	0.98345	-0.46835
270	25_Sept_18	Sample	3545 102533A #1	-2.70229	-2.71107	-1.74032	-1.81659	12.841	-0.153392	26.5217	2.67971	0.011407	0.010965	-0.84188	-0.0086008	0.59461	0.67561	0.68661	-0.046923
271	25_Sept_18	Standard	102-GC-AZ01	0.413857	0.405071	-15.1261	-15.2024	2.76058	-0.236197	-1.88741	0.0550065	0.011435	0.010988	-0.84224	-0.0085993	0.62811	0.70911	0.72011	-0.29834
272	26_Sept_18	Sample	3528 102534A #1	-39.1136	-39.1224	-1.29014	-1.36641	-22.7495	-0.51386	27.4447	3.17599	0.011462	0.011011	-0.8426	-0.0085978	0.64321	0.72421	0.73521	0.34401
273	26_Sept_18	Sample	3528 102525A #1	-37.1981	-37.2069	-0.973908	-1.05018	-20.6048	-0.541592	27.8224	2.97395	0.011489	0.011034	-0.84296	-0.0085963	0.58896	0.66996	0.68096	0.095961
274	26_Sept_18	Heated Gas	SBU-HEG-30	-2.912		2.69572		16.4295	-0.664244	35.4064	3.47013	0.011517	0.011057	-0.84332	-0.0085948	0.016655	0.097655	0.108655	-0.071098
275	26_Sept_18	Standard	IAEA-603	2.19014	2.18136	-2.22424	-2.30051	16.902	-0.4093	25.16	2.50249	0.011544	0.01108	-0.84368	-0.0085933	0.27715	0.35815	0.36915	-0.17529
276	26_Sept_18	Sample	3528 102534A #2	-25.909	-25.9178	-9.30262	-9.37889	-17.452	-0.534105	10.3033	1.48217	0.011572	0.011103	-0.84404	-0.0085918	0.56139	0.64239	0.65339	0.078218
278	27_Sept_18	Sample	3545 102511B #1	-45.4314	-45.4402	-0.989099	-1.06537	-28.7506	-0.607819	28.0628	3.32403	0.011627	0.011149	-0.84476	-0.0085888	0.62251	0.70351	0.71451	0.35394
279	27_Sept_18	Equil Gas	SBU-EEG-27	-2.91186		4.27382		18.834	0.18989	39.6047	3.70669	0.011654	0.011172	-0.84512	-0.0085873	0.87721	0.95821	0.96921	-0.29437
280	27_Sept_18	Sample	3545 102533B #1	-7.83886	-7.84764	-1.96322	-2.03949	7.51368	-0.23431	25.9976	2.68073	0.011682	0.011194	-0.84547	-0.0085858	0.57267	0.65367	0.66467	-0.13466
281	27_Sept_18	Standard	102-GC-AZ01	0.130571	0.121786	-14.6669	-14.7432	2.94501	-0.226778	-0.820363	0.236186	0.011709	0.011217	-0.84583	-0.0085843	0.6356	0.7166	0.7276	-0.2025
282	27_Sept_18	Sample	3545 102533A #2	-8.17771	-8.1865	-1.40115	-1.47742	7.78128	-0.180344	27.8485	3.37076	0.011737	0.01124	-0.84619	-0.0085828	0.62547	0.70647	0.71747	0.3629
283	28_Sept_18	Standard	IAEA-603	2.58743	2.57864	-2.29961	-2.37588	17.2768	-0.351654	25.4903	2.90723	0.011764	0.011263	-0.84655	-0.0085813	0.33013	0.41113	0.42213	0.097387
285	28_Sept_18	Heated Gas	SBU-HDG-61	-3.07671		-15.0156		-1.12558	-0.854963	-1.99797	0.360175	0.011819	0.011309	-0.84727	-0.0085783	0.032799	0.1138	0.124799	0.030707
October 2018 analytical session
327	15_Oct_18	Equil Gas	SBU-EDG-29	-2.87714		-10.3184		4.50098	0.0107078	8.36638	0.882118	0.012945	0.012249	-0.86199	-0.0085166	0.85941	0.94041	0.95141	-0.56622
328	15_Oct_18	Sample	3528 102525A #1	-37.1196	-37.2051	-1.1356	-1.16451	-20.7359	-0.598904	27.7306	3.24653	0.012972	0.012272	-0.86234	-0.0085151	0.57067	0.65167	0.66267	-0.38661
329	15_Oct_18	Sample	3528 102534A #1	-38.9103	-38.9959	-1.14145	-1.17036	-22.5797	-0.684964	27.2614	2.89026	0.013	0.012295	-0.8627	-0.0085136	0.50806	0.58906	0.60006	-0.70457
331	16_Oct_18	Sample	3545 102533a #1	-2.321	-2.40657	-1.69475	-1.72366	13.2747	-0.140227	27.2862	3.32106	0.013055	0.012341	-0.86342	-0.0085106	0.58812	0.66912	0.68012	-0.30421
332	16_Oct_18	Sample	3545 102533a #2	-8.06771	-8.15329	-1.25552	-1.28443	7.99945	-0.210052	28.1414	3.41201	0.013082	0.012363	-0.86378	-0.0085091	0.58688	0.66788	0.67888	-0.32517
333	16_Oct_18	Heated Gas	SBU-HDG-63	-2.91286		-14.9668		-0.938507	-0.873461	-2.01502	0.268542	0.01311	0.012386	-0.86414	-0.0085076	0.030515	0.11152	0.122515	-0.0089154
334	16_Oct_18	Sample	3545 102533B #2	-8.02886	-8.11443	-2.34547	-2.37438	7.03391	-0.161303	25.7348	3.06857	0.013137	0.012409	-0.8645	-0.0085061	0.64952	0.73052	0.74152	-0.41849
335	17_Oct_18	Standard	102-GC-AZ01	0.584429	0.498857	-15.2256	-15.2545	2.82298	-0.244721	-2.23136	-0.0977054	0.013164	0.012432	-0.86486	-0.0085046	0.62034	0.70134	0.71234	-0.34869
338	17_Oct_18	Equil Gas	SBU-EEG-30	-2.88586		4.373		18.9831	0.215107	40.4928	4.34988	0.013247	0.012501	-0.86593	-0.0085001	0.87056	0.95156	0.96256	-0.92759
340	18_Oct_18	Standard	IAEA-603	2.54557	2.46	-2.34109	-2.37	17.1662	-0.383017	25.6196	3.13788	0.013302	0.012547	-0.86665	-0.0084971	0.28643	0.36743	0.37843	-0.41453
343	18_Oct_18	Heated Gas	SBU-HEG-32	-3.27871		2.234		15.5829	-0.702002	35.328	4.30024	0.013384	0.012616	-0.86773	-0.0084926	-0.016473	0.064527	0.075527	-0.45953
345	19_Oct_18	Equil Gas	SBU-EDG-30	-3.04929		-10.2756		4.42222	0.0566612	8.65958	1.04476	0.013439	0.012661	-0.86845	-0.0084896	0.90515	0.98615	0.99715	-0.51526
346	19_Oct_18	Standard	SBU-Carrara	2.127	2.04143	-1.90888	-1.93779	17.1816	-0.376523	26.3929	3.07866	0.013467	0.012684	-0.86881	-0.0084881	0.29096	0.37196	0.38296	-0.64604
347	25_Oct_18	Heated Gas	SBU-HDG-39	-3.03		-15.4821		-1.50937	-0.834638	-3.14541	0.0720428	0.013494	0.012707	-0.86916	-0.0084866	0.082244	0.16324	0.174244	-0.05283
348	26_Oct_18	Equil Gas	SBU-EDG-31	-3.05		-10.4412		4.27219	0.0676107	8.31393	1.00424	0.013521	0.01273	-0.86952	-0.0084851	0.91796	0.99896	1.00996	-0.52693
November 2018 analytical session
369	14_Nov_18	Standard	IAEA-603	2.56857	2.4636	-2.40346	-2.42437	17.0671	-0.436794	24.7356	2.45689	0.0087063	0.01059	-0.84038	-0.020073	0.29785	0.37885	0.38985	-0.35362
371	14_Nov_18	Heated Gas	SBU-HDG-65	-3.10214		-15.2208		-1.35224	-0.856761	-2.23145	0.521535	0.0086675	0.010515	-0.84027	-0.019546	0.021675	0.10268	0.113675	0.14141
374	15_Nov_18	Equil Gas	SBU-EEG-34	-2.93957		4.29471		18.7854	0.15086	39.496	3.6053	0.0086094	0.010401	-0.8401	-0.018755	0.90752	0.98852	0.99952	-0.56672
376	16_Nov_18	Standard	102-GC-AZ01	0.533286	0.428314	-15.1245	-15.1454	2.86869	-0.244357	-1.02413	0.92605	0.0085707	0.010326	-0.83998	-0.018228	0.63333	0.71433	0.72533	0.41311
377	16_Nov_18	Heated Gas	SBU-HEG-9	-2.77771		6.75958		20.4946	-0.678935	44.9117	5.02339	0.0085513	0.010288	-0.83992	-0.017964	0.011793	0.092793	0.103793	0.34515
380	17_Nov_18	Standard	IAEA-603	2.53814	2.43317	-2.41369	-2.43459	17.0217	-0.442524	25.5129	3.24161	0.0084932	0.010174	-0.83975	-0.017173	0.29433	0.37533	0.38633	0.30608
382	17_Nov_18	Equil Gas	SBU-EDG-34	-2.916		-10.3046		4.47166	0.00973859	8.50618	1.00368	0.0084544	0.010099	-0.83964	-0.016646	0.88717	0.96817	0.97917	-0.4004
385	18_Nov_18	Standard	102-GC-AZ01	0.471286	0.366314	-14.8958	-14.9167	3.12143	-0.154795	-0.0874461	1.33831	0.0083963	0.0099854	-0.83946	-0.015854	0.72393	0.80493	0.81593	0.69857
387	19_Nov_18	Sample	3528 102534A #2	-26.4853	-26.5903	-9.26304	-9.28394	-17.9346	-0.492655	10.9644	2.02323	0.0083576	0.0099098	-0.83935	-0.015327	0.55214	0.63314	0.64414	0.37184
388	19_Nov_18	Heated Gas	SBU-HEG-34	-2.90857		1.92449		15.6273	-0.718865	34.5262	4.12448	0.0083382	0.009872	-0.83929	-0.015063	0.016411	0.097411	0.108411	0.33033
390	20_Nov_18	Equil Gas	SBU-EEG-35	-2.92		4.26856		18.7775	0.149202	39.4265	3.58907	0.0082995	0.0097964	-0.83918	-0.014536	0.90714	0.98814	0.99914	-0.65964
391	20_Nov_18	Sample	3418 79017E #1	-45.0591	-45.1641	-1.31366	-1.33456	-28.5745	-0.490284	27.7794	3.54211	0.0082801	0.0097586	-0.83912	-0.014272	0.64621	0.72721	0.73821	0.34536
392	20_Nov_18	Sample	3418 79159A #1	-41.6627	-41.7677	-1.19973	-1.22063	-25.1999	-0.550488	27.973	3.56833	0.0082607	0.0097208	-0.83906	-0.014009	0.55253	0.63353	0.64453	0.34872
393	21_Nov_18	Sample	3418 79017E #1	-44.9613	-45.0663	-1.44497	-1.46588	-28.626	-0.515264	26.8638	2.92206	0.0082414	0.009683	-0.839	-0.013745	0.61863	0.69963	0.71063	-0.20162
395	21_Nov_18	Heated Gas	SBU-HDG-67	-2.95786		-14.9855		-0.971384	-0.843977	-1.73273	0.558925	0.0082026	0.0096074	-0.83889	-0.013218	0.030015	0.11101	0.122015	0.022759
396	21_Nov_18	Standard	102-GC-AZ01	0.257714	0.152743	-15.0944	-15.1154	2.59532	-0.280103	-1.64414	0.284781	0.0081833	0.0095696	-0.83883	-0.012954	0.59462	0.67562	0.68662	-0.26393
399	22_Nov_18	Equil Gas	SBU-EDG-35	-2.97586		-10.3642		4.3771	0.0312837	8.16107	0.753213	0.0081251	0.0094562	-0.83866	-0.012163	0.90702	0.98802	0.99902	-0.7009
400	22_Nov_18	Sample	3418 79159 #1	-40.4249	-40.5298	-1.31395	-1.33486	-24.0586	-0.513361	27.0392	2.83347	0.0081058	0.0094184	-0.8386	-0.011899	0.57614	0.65714	0.66814	-0.34168
402	23_Nov_18	Sample	3545 102524C #1	-39.2989	-39.4038	-0.930527	-0.951431	-22.5612	-0.477359	27.8354	2.84898	0.008067	0.0093428	-0.83849	-0.011372	0.59998	0.68098	0.69198	-0.40811
403	23_Nov_18	Standard	IAEA-603	2.55186	2.44689	-2.31509	-2.336	17.1409	-0.433673	25.13	2.67119	0.0080477	0.009305	-0.83843	-0.011108	0.30788	0.38888	0.39988	-0.34514
404	23_Nov_18	Heated Gas	SBU-HEG-38	-3.03657		3.41364		16.9813	-0.686438	37.2076	3.88715	0.0080283	0.0092672	-0.83837	-0.010845	0.043906	0.12491	0.135906	-0.23274
405	23_Nov_18	Sample	3545 102511B #1	-45.482	-45.587	-1.26443	-1.28534	-28.9515	-0.499007	27.3978	3.08696	0.0080089	0.0092294	-0.83831	-0.010581	0.62874	0.70974	0.72074	-0.14546
408	24_Nov_18	Equil Gas	SBU-EEG-36	-2.956		4.27514		18.7751	0.174318	39.3847	3.50914	0.0079508	0.009116	-0.83814	-0.0097899	0.93533	1.0163	1.02733	-0.82957
413	25_Nov_18	Heated Gas	SBU-HEG-39	-2.92771		0.545329		14.2709	-0.716375	31.2759	3.56413	0.0078539	0.0089271	-0.83785	-0.0084716	0.037273	0.11827	0.129273	-0.061942
416	26_Nov_18	Heated Gas	SBU-HDG-71	-2.87686		-14.7844		-0.697852	-0.844103	-1.10809	0.800667	0.0077958	0.0088137	-0.83768	-0.0076805	0.026079	0.10708	0.118079	0.11103
420	27_Nov_18	Standard	IAEA-603	2.58843	2.48346	-2.39718	-2.41809	17.0906	-0.439123	25.1768	2.87812	0.0077183	0.0086625	-0.83745	-0.0066258	0.30675	0.38775	0.39875	-0.22737
March 2019 analytical session
530	18_Mar_19	Standard	102-GC-AZ01	0.752714	0.765786	-14.9341	-14.3285	3.25237	-0.259017	-1.46104	0.138237	0.009212	0.0086622	-0.84051	-0.0049118	0.60258	0.68358	0.69458	-0.43472
531	18_Mar_19	Equil Gas	SBU-EDG-47	-2.89143		-10.3198		4.50607	0.0336139	8.50385	1.00368	0.009186	0.0086431	-0.84065	-0.0048508	0.89635	0.97735	0.98835	-0.50449
532	18_Mar_19	Sample	3545 102533A #2	-7.795	-7.78193	-1.45111	-1.46578	8.13656	-0.151898	27.6758	3.26715	0.00916	0.0086239	-0.84079	-0.0047898	0.66771	0.74871	0.75971	-0.037366
533	18_Mar_19	Sample	3545 102524C#1	-38.537	-38.5239	-1.0633	-1.09581	-21.8693	-0.406516	28.4104	3.58643	0.0091339	0.0086047	-0.84092	-0.0047288	0.68781	0.76881	0.77981	0.21303
534	19_Mar_19	Sample	3545 102511B #1	-45.2676	-45.2545	-1.33703	-1.35695	-28.7666	-0.454526	27.5826	3.3607	0.0091079	0.0085856	-0.84106	-0.0046678	0.70266	0.78366	0.79466	0.065402
535	19_Mar_19	Equil Gas	SBU-EEG-46	-2.861		4.34627		18.8972	0.134775	39.5866	3.61052	0.0090819	0.0085664	-0.84119	-0.0046068	0.86563	0.94663	0.95763	-0.80517
536	19_Mar_19	Sample	3528 102525A #1	-36.8771	-36.8641	-1.18205	-1.2091	-20.3705	-0.421772	27.8258	3.25338	0.0090559	0.0085472	-0.84133	-0.0045457	0.65621	0.73721	0.74821	-0.065199
537	19_Mar_19	Standard	IAEA-603	2.349	2.36207	-2.36811	-2.3406	16.8627	-0.460955	25.2326	2.8996	0.0090298	0.008528	-0.84147	-0.0044847	0.26474	0.34574	0.35674	-0.1765
538	20_Mar_19	Standard	NBS-18	-4.88929	-4.87621	-24.3218	-23.2843	-11.6644	-0.617488	-20.5672	-0.818612	0.0090038	0.0085089	-0.8416	-0.0044237	0.37033	0.45133	0.46233	0.36887
539	20_Mar_19	Sample	3528 102534A #1	-38.5367	-38.5236	-1.41664	-1.43289	-22.2774	-0.484639	27.4938	3.43781	0.0089778	0.0084897	-0.84174	-0.0043627	0.60676	0.68776	0.69876	0.15084
540	20_Mar_19	Sample	3528 102534A #2	-26.6667	-26.6536	-9.30408	-8.95749	-18.1268	-0.469069	10.6034	1.72044	0.0089517	0.0084705	-0.84187	-0.0043017	0.58414	0.66514	0.67614	0.0029071
541	21_Mar_19	Sample	3418 79017E #1	-44.865	-44.8519	-1.50924	-1.52124	-28.5623	-0.484751	26.943	3.09069	0.0089257	0.0084514	-0.84201	-0.0042407	0.66395	0.74495	0.75595	-0.14494
542	21_Mar_19	Sample	3418 79159A #1	-41.5627	-41.5496	-1.38027	-1.39819	-25.221	-0.498634	27.6194	3.51346	0.0088997	0.0084322	-0.84215	-0.0041797	0.61766	0.69866	0.70966	0.21432
543	21_Mar_19	Heated Gas	SBU-HEG-45	-2.965		6.50105		20.0601	-0.678038	44.1237	4.74933	0.0088737	0.008413	-0.84228	-0.0041186	0.012723	0.093723	0.104723	-0.07983
544	22_Mar_19	Standard	102-GC-AZ01	0.408143	0.421214	-15.2288	-14.6097	2.63396	-0.255891	-1.65274	0.508192	0.0088476	0.0083939	-0.84242	-0.0040576	0.61271	0.69371	0.70471	-0.079147
545	22_Mar_19	Equil Gas	SBU-EDG-48	-2.83		-10.2827		4.60972	0.0420885	8.8292	1.24868	0.0088216	0.0083747	-0.84256	-0.0039966	0.90454	0.98554	0.99654	-0.31057
546	22_Mar_19	Heated Gas	SBU-HDG-79	-2.75714		-15.2047		-1.01103	-0.865798	-2.20055	0.5275	0.0087956	0.0083555	-0.84269	-0.0039356	0.012012	0.093012	0.104012	-0.014105
547	22_Mar_19	Heated Gas	SBU-HEG-46	-2.92657		7.01987		20.5795	-0.69995	45.3541	4.98087	0.0087695	0.0083364	-0.84283	-0.0038746	-0.012133	0.068867	0.079867	0.043974
548	23_Mar_19	Sample	3545 102511B#1	-45.2911	-45.2781	-1.1118	-1.14207	-28.6686	-0.546075	27.6648	3.10719	0.0087435	0.0083172	-0.84296	-0.0038136	0.59607	0.67707	0.68807	-0.19572
549	23_Mar_19	Sample	3545 102524C#1	-39.2693	-39.2562	-0.847707	-0.890135	-22.4692	-0.492501	28.5306	3.38551	0.0087175	0.008298	-0.8431	-0.0037526	0.59421	0.67521	0.68621	0.0034515
550	23_Mar_19	Sample	3545 102533A #2	-8.24514	-8.23207	-1.08594	-1.11741	7.97666	-0.221782	27.8827	2.85384	0.0086915	0.0082789	-0.84324	-0.0036916	0.60024	0.68124	0.69224	-0.46873
551	23_Mar_19	Equil Gas	SBU-EEG-47	-2.856		4.35723		18.9268	0.147782	39.5966	3.58507	0.0086654	0.0082597	-0.84337	-0.0036305	0.88614	0.96714	0.97814	-0.81615
552	24_Mar_19	Standard	IAEA-603	2.54486	2.55793	-2.42975	-2.3994	17.0486	-0.40725	24.9913	2.72633	0.0086394	0.0082405	-0.84351	-0.0035695	0.32725	0.40825	0.41925	-0.33059
553	24_Mar_19	Sample	3528 102534A#1	-38.907	-38.8939	-1.00955	-1.04453	-22.2551	-0.482013	27.9941	3.15497	0.0086134	0.0082214	-0.84364	-0.0035085	0.60132	0.68232	0.69332	-0.17776
554	24_Mar_19	Sample	3528 102525A#1	-37.1097	-37.0966	-1.04227	-1.07575	-20.4821	-0.438051	28.0489	3.22248	0.0085874	0.0082022	-0.84378	-0.0034475	0.63059	0.71159	0.72259	-0.11575
555	24_Mar_19	Heated Gas	SBU-HDG-80	-2.967		-15.0392		-1.03121	-0.84359	-1.77437	0.617719	0.0085613	0.008183	-0.84392	-0.0033865	0.03607	0.11707	0.12807	0.016479
556	25_Mar_19	Standard	NBS-18	-4.91886	-4.90579	-24.4139	-23.3722	-11.7664	-0.603568	-20.841	-0.938341	0.0085353	0.0081639	-0.84405	-0.0033255	0.38014	0.46114	0.47214	0.20595
557	25_Mar_19	Equil Gas	SBU-EDG-49	-2.86257		-10.3087		4.54152	0.030263	8.71216	1.19265	0.0085093	0.0081447	-0.84419	-0.0032645	0.89342	0.97442	0.98542	-0.37354
558	25_Mar_19	Heated Gas	SBU-HEG-47	-3.07171		7.05084		20.497	-0.670713	45.3276	4.86697	0.0084832	0.0081255	-0.84432	-0.0032034	0.026422	0.10742	0.118422	-0.051593
559	26_Mar_19	Sample	3418 79017E #1	-44.9311	-44.9181	-1.17022	-1.19781	-28.3141	-0.488305	27.7879	3.27873	0.0084572	0.0081064	-0.84446	-0.0031424	0.64465	0.72565	0.73665	-0.034537
560	26_Mar_19	Sample	3418 79159A #1	-41.7974	-41.7844	-1.19082	-1.21746	-25.2343	-0.457358	27.7597	3.25374	0.0084312	0.0080872	-0.8446	-0.0030814	0.6491	0.7301	0.7411	-0.056931
561	26_Mar_19	Sample	3528 102536B #2	-25.856	-25.8429	-12.6846	-12.1825	-20.6535	-0.572996	3.18718	0.879931	0.0084052	0.008068	-0.84473	-0.0030204	0.48835	0.56935	0.58035	-0.18824
562	26_Mar_19	Sample	3418 79159 B #1	-44.0066	-43.9935	-1.55131	-1.56137	-27.7893	-0.51414	27.046	3.29774	0.0083791	0.0080489	-0.84487	-0.0029594	0.61086	0.69186	0.70286	0.052267
563	27_Mar_19	Sample	3418 79017E #2	-44.173	-44.1599	-1.55321	-1.56318	-27.9211	-0.479533	26.7607	2.98995	0.0083531	0.0080297	-0.845	-0.0028984	0.64647	0.72747	0.73847	-0.22978
564	27_Mar_19	Standard	102-GC-AZ01	0.154571	0.167643	-15.0332	-14.4231	2.56946	-0.265786	-1.48968	0.308919	0.0083271	0.0080105	-0.84514	-0.0028374	0.60441	0.68541	0.69641	-0.3393
565	27_Mar_19	Equil Gas	SBU-EEG-48	-2.81814		4.33765		18.9478	0.151753	39.5774	3.6017	0.008301	0.0079913	-0.84528	-0.0027764	0.8964	0.9774	0.9884	-0.78338
566	27_Mar_19	Sample	3545 102533B #1	-4.64386	-4.63079	-1.47565	-1.48919	11.152	-0.198137	27.2505	2.93922	0.008275	0.0079722	-0.84541	-0.0027153	0.60143	0.68243	0.69343	-0.3254
567	28_Mar_19	Sample	3528 102525 (N-S) #2	-20.3237	-20.3106	-8.86544	-8.53903	-11.5083	-0.434791	11.8342	2.05839	0.008249	0.007953	-0.84555	-0.0026543	0.54993	0.63093	0.64193	0.1932
568	28_Mar_19	Sample	3528 102534A #4	-34.812	-34.7989	-1.93546	-1.92785	-19.1095	-0.475401	26.1466	3.08443	0.008223	0.0079338	-0.84568	-0.0025933	0.57292	0.65392	0.66492	-0.080257
569	28_Mar_19	Heated Gas	SBU-HDG-81	-2.98971		-15.0286		-1.04743	-0.847007	-1.35999	1.01827	0.0081969	0.0079147	-0.84582	-0.0025323	0.034654	0.11565	0.126654	0.3464
570	29_Mar_19	Sample	3528 102534 A(F) #2	-39.4259	-39.4128	-1.46951	-1.48334	-23.183	-0.469666	27.296	3.33113	0.0081709	0.0078955	-0.84596	-0.0024713	0.6115	0.6925	0.7035	0.062544
571	29_Mar_19	Standard	NBS-18	-5.08071	-5.06764	-24.2259	-23.1929	-11.7435	-0.608469	-20.7165	-1.16862	0.0081449	0.0078763	-0.84609	-0.0024103	0.37194	0.45294	0.46394	-0.094122
572	29_Mar_19	Sample	3528 102536B #1	-34.3466	-34.3335	-2.32298	-2.29754	-19.0207	-0.476593	25.3804	3.06838	0.0081188	0.0078572	-0.84623	-0.0023493	0.56811	0.64911	0.66011	-0.027268
573	29_Mar_19	Heated Gas	SBU-HEG-48	-2.78186		6.42334		20.1499	-0.692618	44.0877	4.87568	0.0080928	0.007838	-0.84636	-0.0022883	0.016973	0.097973	0.108973	0.09124
574	30_Mar_19	Sample	3418 79017F #1	-40.4781	-40.4651	-1.31556	-1.33646	-24.095	-0.495422	27.5816	3.34845	0.0080668	0.0078188	-0.8465	-0.0022272	0.5908	0.6718	0.6828	0.053777
575	30_Mar_19	Sample	3529 64436B #1	-23.386	-23.3729	-5.47422	-5.30381	-11.2046	-0.383663	19.1978	2.84665	0.0080408	0.0077997	-0.84664	-0.0021662	0.59775	0.67875	0.68975	0.30854
576	30_Mar_19	Sample	3418 79159B #1	-43.9404	-43.9274	-1.60594	-1.61349	-27.7729	-0.511385	27.1957	3.54431	0.0080147	0.0077805	-0.84677	-0.0021052	0.60343	0.68443	0.69543	0.2846
577	30_Mar_19	Equil Gas	SBU-EDG-50	-2.86429		-10.3385		4.51055	0.0298639	8.41018	0.94983	0.0079887	0.0077613	-0.84691	-0.0020442	0.89488	0.97588	0.98688	-0.61904
578	31_Mar_19	Standard	ETH-4	-10.0624	-10.0494	-19.7283	-18.9021	-12.1097	-0.538132	-11.4142	-0.40871	0.0079627	0.0077422	-0.84704	-0.0019832	0.4454	0.5264	0.5374	-0.19738
579	31_Mar_19	Sample	3545 102533B#1	-4.62857	-4.6155	-1.48719	-1.5002	11.1623	-0.192141	27.568	3.26385	0.0079366	0.007723	-0.84718	-0.0019222	0.61152	0.69252	0.70352	-0.028806
580	31_Mar_19	Sample	3528 102525F (N-S) #2	-20.1539	-20.1408	-9.04131	-8.7068	-11.5437	-0.469243	11.4223	2.01549	0.0079106	0.0077038	-0.84732	-0.0018612	0.51138	0.59238	0.60338	0.17114
581	31_Mar_19	Sample	3528 102534A #4	-39.3957	-39.3826	-1.47185	-1.48556	-23.1904	-0.505666	19.7881	-3.959	0.0078846	0.0076847	-0.84745	-0.0018001	0.56763	0.64863	0.65963	-6.5542
582	31_Mar_19	Equil Gas	SBU-EEG-49	-2.86257		4.29062		18.8693	0.161181	39.4827	3.58666	0.0078586	0.0076655	-0.84759	-0.0017391	0.9139	0.9949	1.0059	-0.77303
583	01_Apr_19	Sample	3528 102534A (F) #2	-34.9603	-34.9472	-2.1512	-2.13367	-19.4562	-0.474163	25.6847	3.03853	0.0078325	0.0076463	-0.84772	-0.0016781	0.56925	0.65025	0.66125	-0.085158
584	01_Apr_19	Standard	NBS-18	-5.221	-5.20793	-23.9719	-22.9506	-11.6392	-0.615645	-20.59	-1.51931	0.0078065	0.0076272	-0.84786	-0.0016171	0.35954	0.44054	0.45154	-0.50549
585	01_Apr_19	Sample	3528 102536B #1	-34.1854	-34.1724	-2.38608	-2.35774	-18.9135	-0.468777	25.0761	2.87904	0.0077805	0.007608	-0.848	-0.0015561	0.56904	0.65004	0.66104	-0.19099
586	01_Apr_19	Heated Gas	SBU-HDG-82	-2.80157		-15.0915		-0.930276	-0.851305	-2.16037	0.339011	0.0077544	0.0075888	-0.84813	-0.0014951	0.031475	0.11247	0.123475	-0.30017
587	01_Apr_19	Sample	3529 64436B #1	-23.3683	-23.3552	-5.61415	-5.43731	-11.3062	-0.369936	18.2748	2.18808	0.0077284	0.0075697	-0.84827	-0.0014341	0.60946	0.69046	0.70146	-0.27584
588	02_Apr_19	Sample	3440 102535B #1	-12.5806	-12.5675	-1.27057	-1.29354	3.54592	-0.225732	27.5502	2.89325	0.0077024	0.0075505	-0.8484	-0.0013731	0.63963	0.72063	0.73163	-0.39792
589	02_Apr_19	Sample	3440 102535B #1	-12.6446	-12.6315	-1.31833	-1.33911	3.42415	-0.237719	27.6242	3.06981	0.0076764	0.0075313	-0.84854	-0.001312	0.62834	0.70934	0.72034	-0.22748
590	02_Apr_19	Sample	3528 102536B #2	-25.6041	-25.5911	-12.8116	-12.3036	-20.5448	-0.58847	2.99272	0.941643	0.0076503	0.0075122	-0.84868	-0.001251	0.45697	0.53797	0.54897	-0.16488
591	02_Apr_19	Heated Gas	SBU-HEG-49	-2.90843		5.87413		19.5217	-0.664034	42.6551	4.49728	0.0076243	0.007493	-0.84881	-0.00119	0.064006	0.14501	0.156006	-0.13599
Note: Sample unknowns for this study are highlighted in bold text. All other rows contain data for the equilibrium reference gases used to normalize data and carbonate standards used to monitor accuracy and precision.
* The reference gas or "ref gas" for all isotope measurements is an Oztech Trading Corporation CO2 bottle with d13C = -3.59 ‰ (PDB) and d18O = 24.91 ‰ (SMOW).
#Modeled, time varying slope and intercept of the heated gas line (Huntington et al. 2009; Passey et al. 2010). Values are determined by inverse modeling measured heated gas data using a low-order polynomial and as a function of sequence number.
¥Modeled time varying slope and intercept of the 'equilibrated gas line' (see Dennis et al., 2011 for equilibrated gas line description). 'Equilibrated gases' are equilibrated with water at ~30 °C (see Henkes et al., 2013 for the apparatus design)
&D47 values relative to the carbonate dioxide equilibrium scale or CDES and a 90 °C acid reaction. Cell to the right provide various corrections to a canonical 25 °C acid reaction temperature.
@D48 values normalized to a time varying D48 heated gas line. Large values (> ±1‰) indicate potential sample contamination or other problems during analysis.
